# Supplementary material for: Tuning the oxygen reduction activity of the Pt–Ni nanoparticles upon specific anion adsorption by varying heat treatment atmospheres
Source: Royal Society of Chemistry journal article supplement (doi:10.1039/c4cp00187g), 2014-01-01
Supplement: c4cp00187g1.pdf [file c4cp00187g1.pdf]

**Electronic Supplementary Information (ESI) for**

**Tuning the Oxygen Reduction Activity of the Pt-Ni Nanoparticles under Specific Anion Adsorption by Varying Heat Treatment Atmosphere**

Young-Hoon Chung<sup>a,b</sup>, Soo Jin Kim<sup>b</sup>, Dong-Young Chung<sup>a,c</sup>, Myung Jae Lee<sup>a,c</sup>, Jong Hyun Jang<sup>b,\*</sup>,  
and Yung-Eun Sung<sup>a,c,\*</sup>

*<sup>a</sup>School of Chemical and Biological Engineering, Seoul National University (SNU), Seoul, 151-742, Republic of Korea*

*<sup>b</sup>Fuel Cell Research Center, Korea Institute of Science and Technology (KIST), Seoul, 136-791, Republic of Korea*

*<sup>c</sup>Center for Nanoparticle Research, Institute of Basic Science (IBS), Seoul, 151-742, Republic of Korea*

\* Corresponding author: E-mail address: [ysung@snu.ac.kr](mailto:ysung@snu.ac.kr) (Y.-E. Sung) and [jhjang@kist.re.kr](mailto:jhjang@kist.re.kr) (J. H. Jang)

Tel.: +82-2-880-1889, Fax: +82-2-880-1604

## S1. Supplementary Half-Cell Data

### S1.1. Cyclic voltamograms of Pt and PtNi nanoparticles

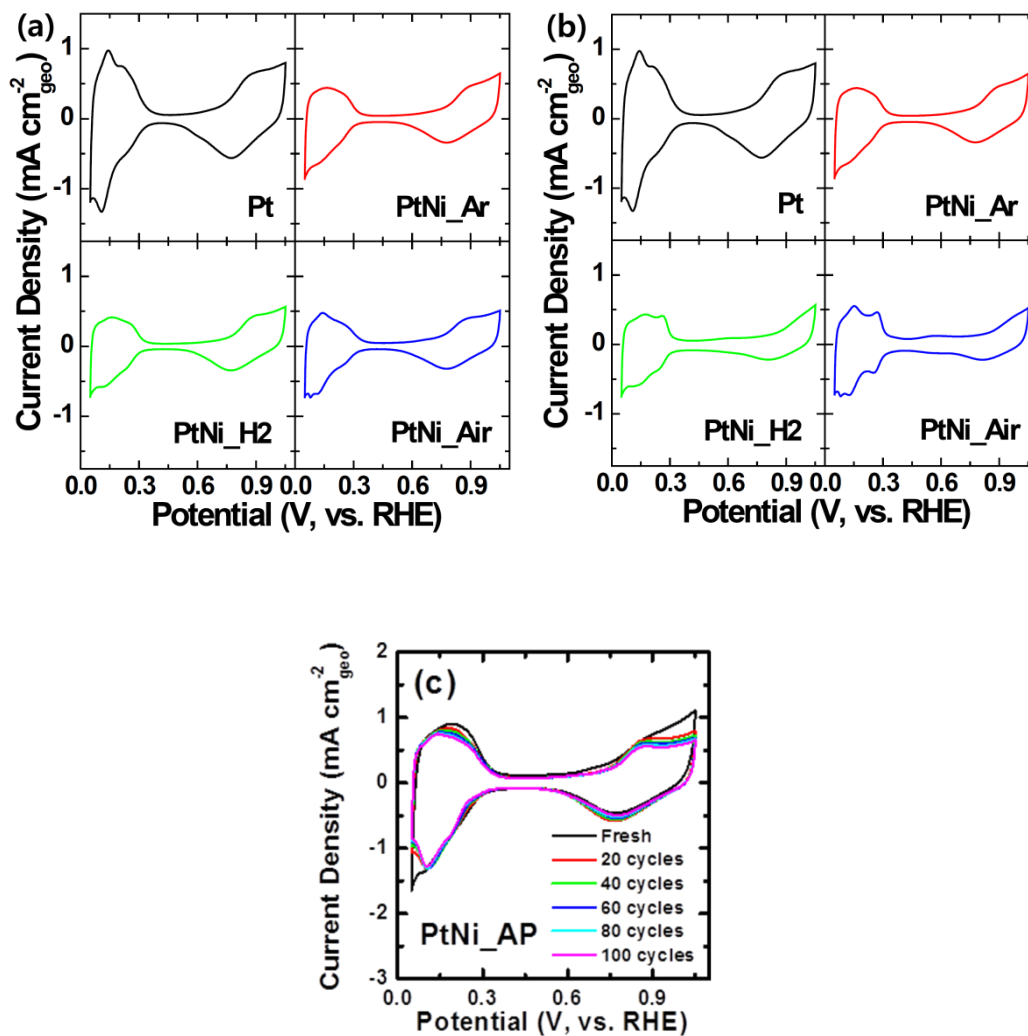

**Fig. S1.** Cyclic voltamograms (CVs) of Pt, PtNi\_Ar, PtNi\_H2, and PtNi\_Air nanoparticles in (a) 0.1 M  $\text{HClO}_4$  and (b) 0.1 M  $\text{HClO}_4 + 0.1 \text{ M H}_3\text{PO}_4$ ; and (c) CVs of PtNi\_AP in 0.1 M  $\text{HClO}_4$  after potential cycling. All measurements were carried out at 20 °C in saturated Ar condition (99.999%).

### S1.2. Kinetic current density

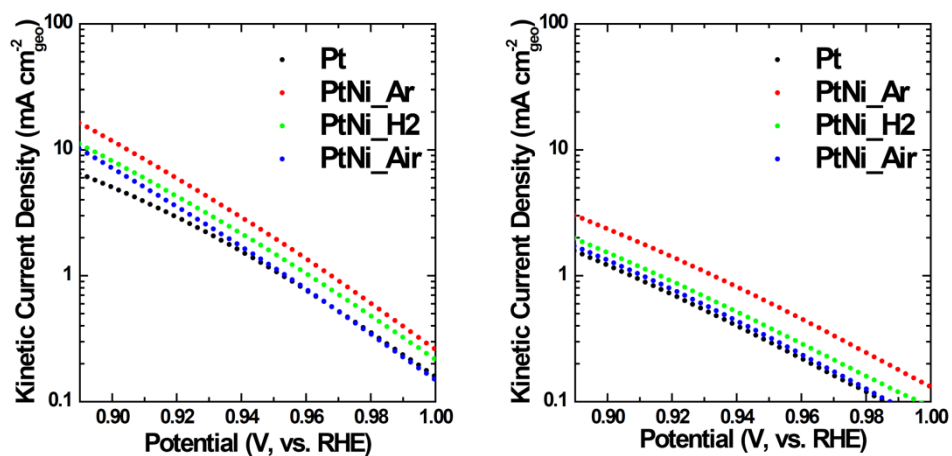

**Fig. S2.** Kinetic current density of Pt , PtNi\_Ar, PtNi\_H2, and PtNi\_Air nanoparticles in 0.1 M HClO<sub>4</sub> (left) and 0.1 M HClO<sub>4</sub> + 0.1 M H<sub>3</sub>PO<sub>4</sub>.(Right)

## S2. XPS Spectra of Pt 4f and Ni 2p

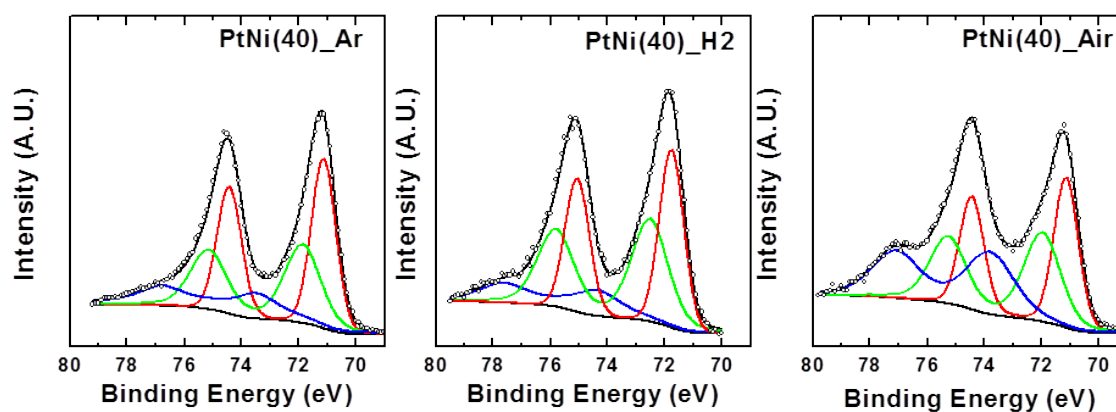

**Fig. S3.** XPS spectra of PtNi\_Ar (left), PtNi\_H2 (middle), and PtNi\_Air (right) nanoparticles for Pt 4f.

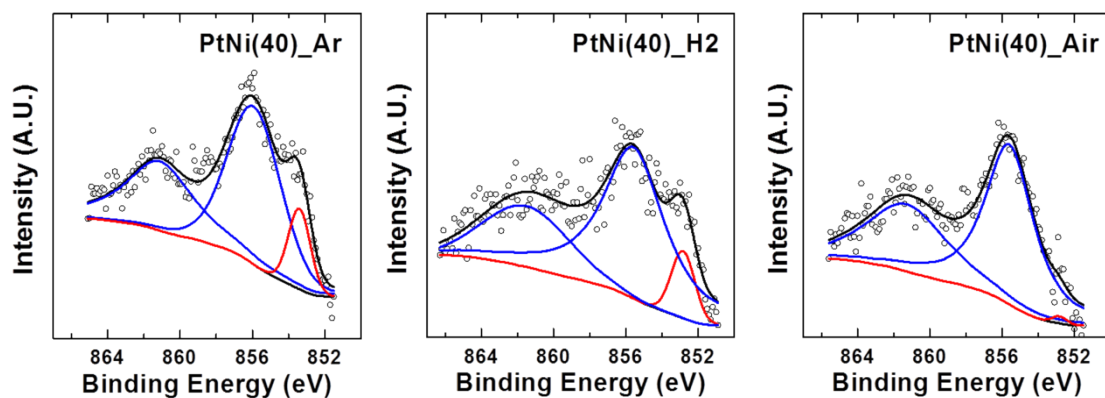

**Fig. S4.** XPS spectra of PtNi\_Ar (left), PtNi\_H2 (middle), and PtNi\_Air (right) nanoparticles for Ni 2p.

**Table S1.** Deconvolution results from XPS spectra of Pt 4f and Ni 2p.

| Area Ratio (%) | Pt 4f |        |        | Ni 2p |        | $x^*$<br>(Pt <sub>1</sub> Ni <sub>x</sub> ) |
|----------------|-------|--------|--------|-------|--------|---------------------------------------------|
|                | Pt(0) | Pt(II) | Pt(IV) | Ni(0) | Ni(II) |                                             |
| PtNi_Ar        | 52.4  | 33.4   | 14.2   | 10.0  | 90.0   | 0.44                                        |
| PtNi_H2        | 56.6  | 23.9   | 19.5   | 11.6  | 88.4   | 0.45                                        |
| PtNi_Air       | 33.0  | 36.1   | 30.9   | 0.6   | 99.4   | 0.50                                        |

### S3. Supplementary Single-Cell Data

#### S3.1. Polarization curves of Pt and PtNi\_Ar under air feed

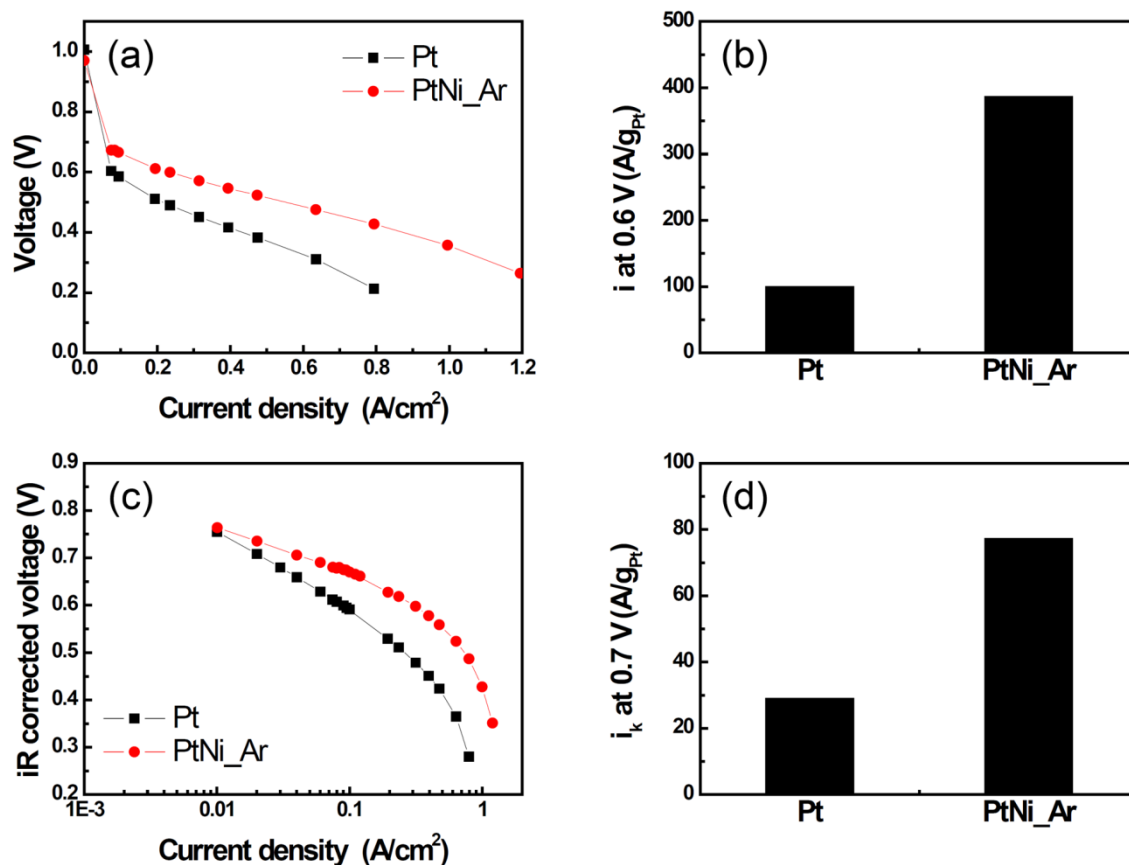

**Fig. S5.** (a) Polarization curve for Pt(HiSpec 4000, 40 wt%, 0.78 mg<sub>Pt</sub> cm<sup>-2</sup>) and PtNi\_Ar(40 wt%, 0.6 mg<sub>Pt</sub> cm<sup>-2</sup>) as cathode catalysts (anode catalyst 1.0 mg<sub>Pt</sub> cm<sup>-2</sup>). The feed gas to cathode is non-humidified air (stoichiometry 2) and cell temperature is 160°C. (b) Comparison of current density normalized with respect to platinum weight at 0.6V. (c) Tafel plot and (d) kinetic current density normalized with respect to platinum weight at 0.7 V

### S3.2. Durability test of PtNi\_Ar nanoparticles

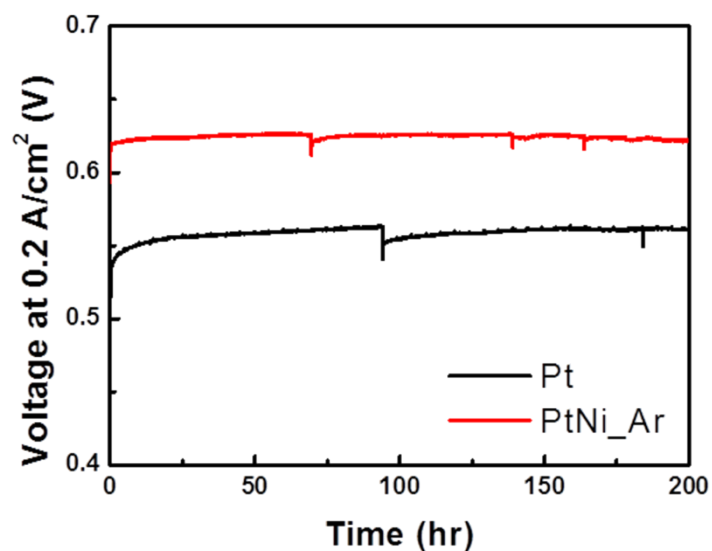

**Fig. S6.** Voltage at 0.2 A/cm<sup>2</sup> for Pt (40 wt.%, 0.78 mg<sub>Pt</sub> cm<sup>-2</sup>) and PtNi\_Ar (40 wt%, 0.6 mg<sub>Pt</sub> cm<sup>-2</sup>) as cathode catalysts (anode catalyst 1.0 mg<sub>Pt</sub> cm<sup>-2</sup>). The feed gas to cathode is non-humidified air(stoichiometry 2) and cell temperature is 160°C.

#### S4. Supplementary TEM Images

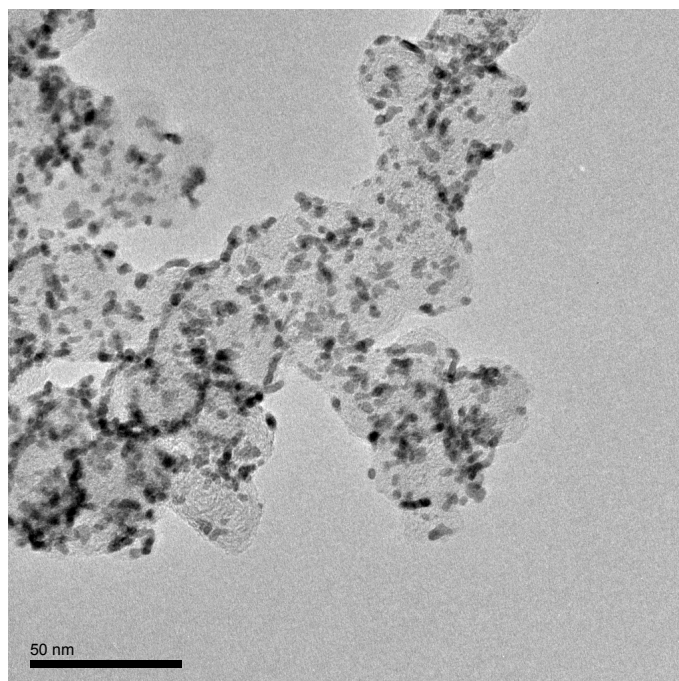

Fig. S7. TEM image of as-prepared Pt<sub>1</sub>Ni<sub>2</sub> /C.

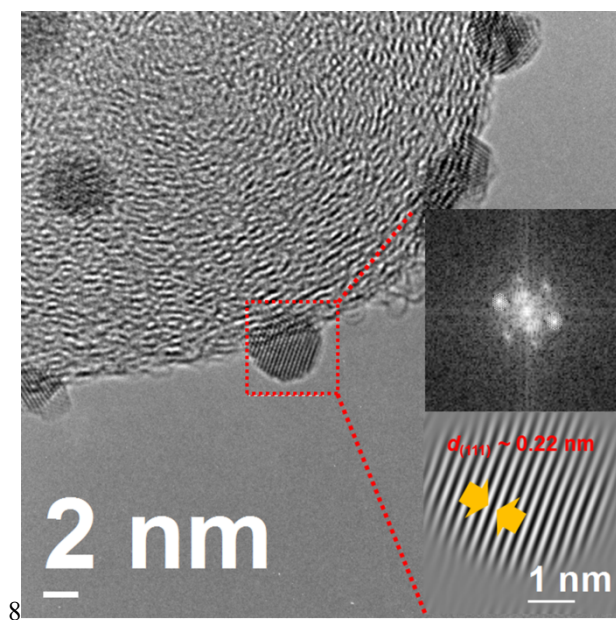

Fig. S8. High resolution-TEM image of the PtNi<sub>2</sub> /C.

## S5. UV-vis Spectra

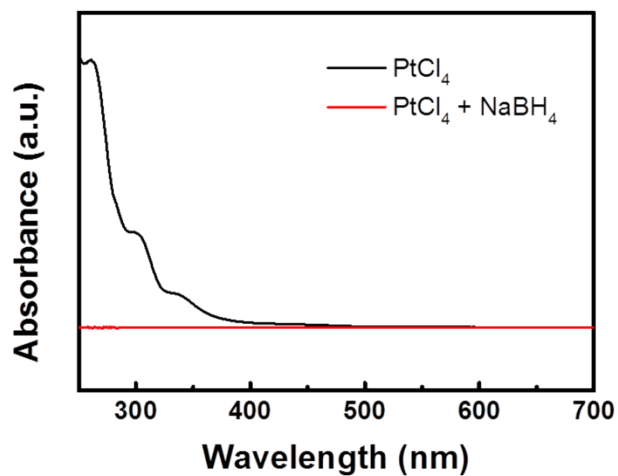

**Fig S9.** UV-vis spectra of PtCl<sub>4</sub> solution in the ethanol before (black)/after (red) the addition of the reducing agent (NaBH<sub>4</sub>).
